# Supplementary material
Source: PubMed Central journal article supplement (PMC4388778)

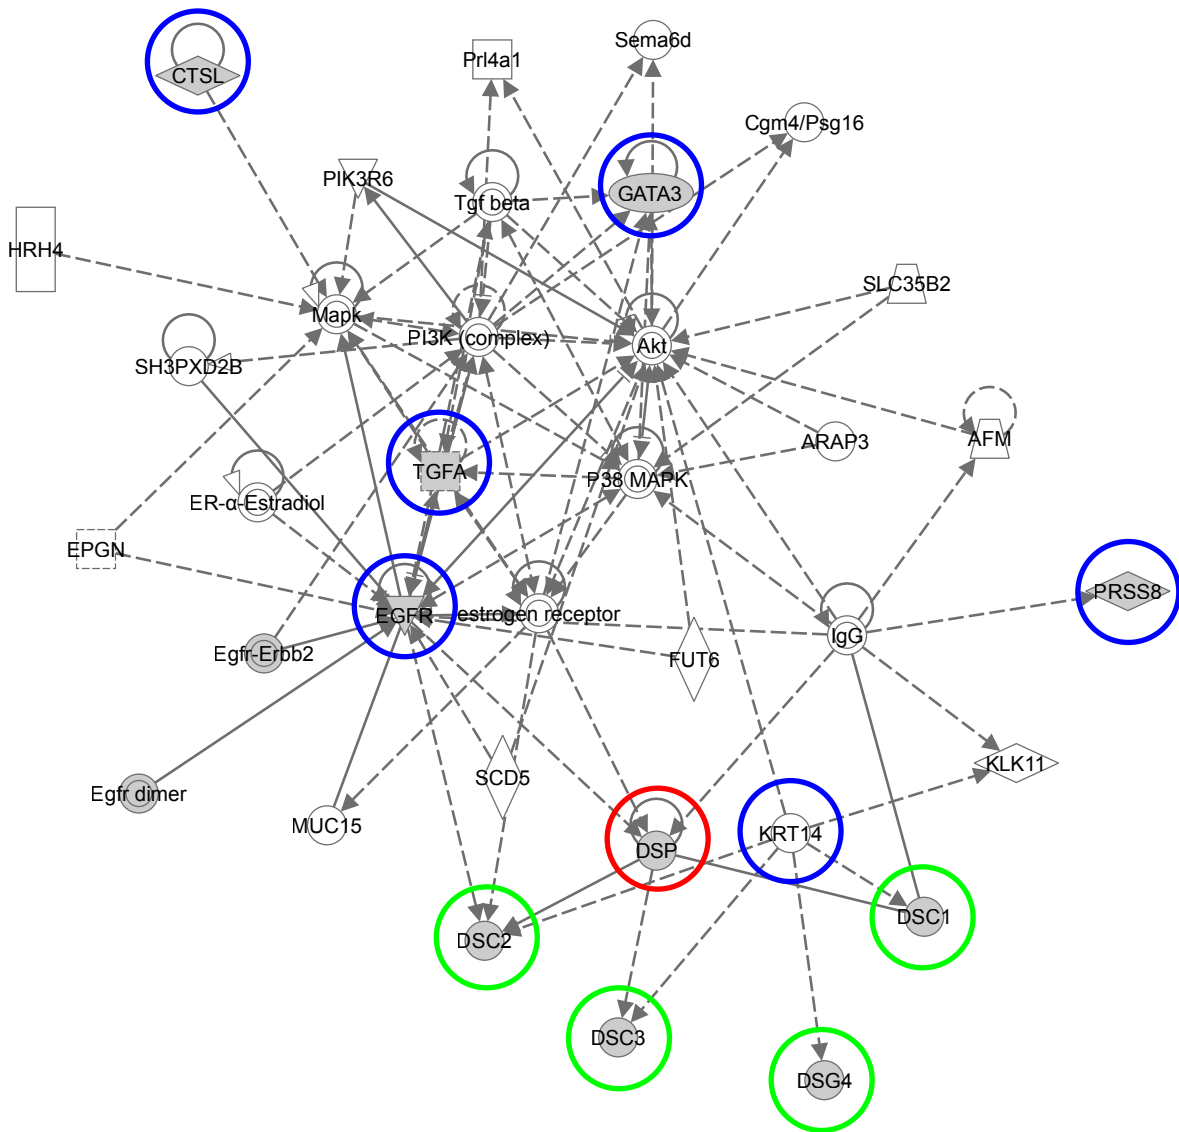

Supplement: NIHMS661752-supplement-1.pdf [file NIHMS661752-supplement-1.pdf]

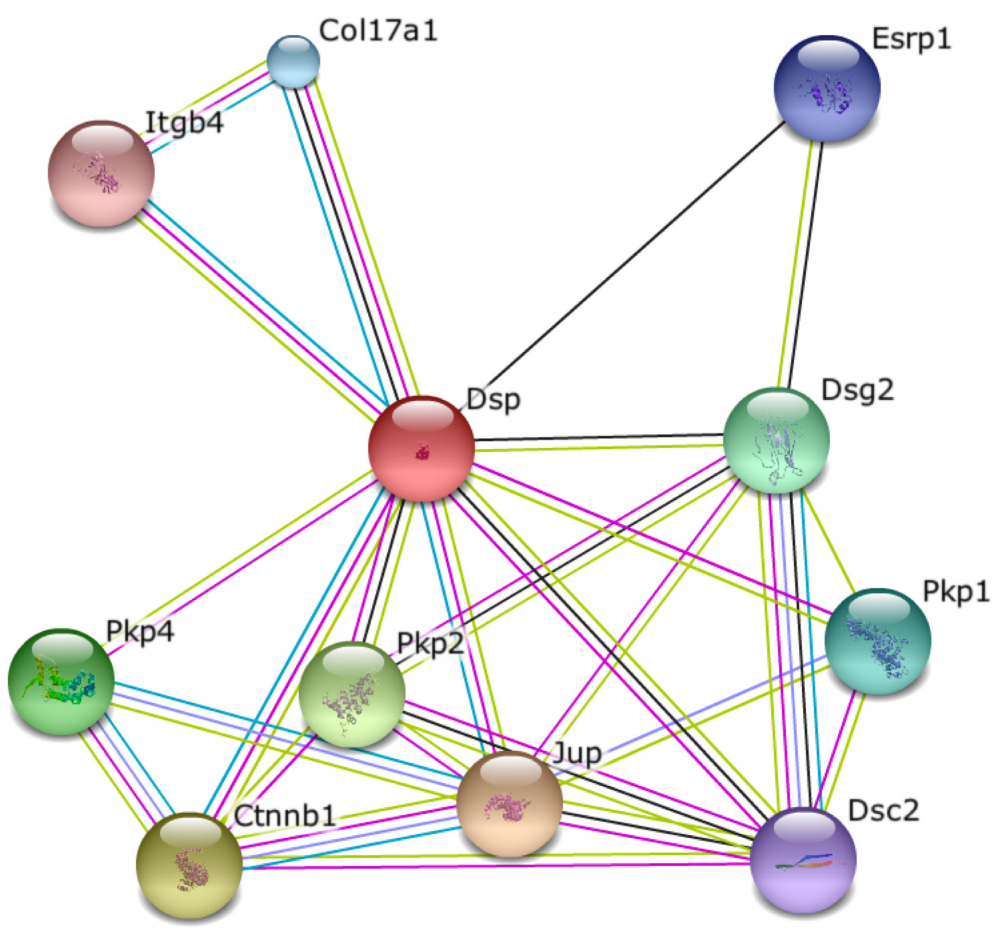

Supplement: NIHMS661752-supplement-2.pdf [file NIHMS661752-supplement-2.pdf]
